# Supplementary material for: Menacalc, a quantitative method of metastasis assessment, as a prognostic marker for axillary node-negative breast cancer
Source: BMC Cancer. 2015 Jun 27;15:483. doi: 10.1186/s12885-015-1468-6 (PMC4482190; doi:10.1186/s12885-015-1468-6)
Supplement: Additional file 1: Table S1. — Time to disease recurrence for the sites of metastasis in the ANN cohort. [file 12885_2015_1468_MOESM1_ESM.pdf]

<?xpacket begin="﻿" id="W5M0MpCehiHzreSzNTczkc9d"?>
<x:xmpmeta xmlns:x="adobe:ns:meta/"
           x:xmptk="Adobe XMP Core 4.2.1-c043 52.372728, 2009/01/18-15:08:04">
   <rdf:RDF xmlns:rdf="http://www.w3.org/1999/02/22-rdf-syntax-ns#">
      <rdf:Description xmlns:xmp="http://ns.adobe.com/xap/1.0/" rdf:about="">
         <xmp:Label>??? 2015, :. doi:10.1186/s12885-015-1468-6</xmp:Label>
      </rdf:Description>
      <rdf:Description xmlns:dc="http://purl.org/dc/elements/1.1/" rdf:about="">
         <dc:format>application/pdf</dc:format>
         <dc:identifier>http://dx.doi.org/10.1186/s12885-015-1468-6</dc:identifier>
         <dc:creator>
            <rdf:Seq>
               <rdf:li>Catherine L. Forse</rdf:li>
               <rdf:li>Seema Agarwal</rdf:li>
               <rdf:li>Dushanthi Pinnaduwage</rdf:li>
               <rdf:li>Frank Gertler</rdf:li>
               <rdf:li>John S. Condeelis</rdf:li>
               <rdf:li>Juan Lin</rdf:li>
               <rdf:li>Xiaonan Xue</rdf:li>
               <rdf:li>Kimberly Johung</rdf:li>
               <rdf:li>Anna Marie Mulligan</rdf:li>
               <rdf:li>Thomas E. Rohan</rdf:li>
               <rdf:li>Shelley B. Bull</rdf:li>
               <rdf:li>Irene L. Andrulis</rdf:li>
            </rdf:Seq>
         </dc:creator>
         <dc:title>
            <rdf:Alt>
               <rdf:li xml:lang="x-default">Menacalc, a quantitative method of metastasis assessment, as a prognostic marker for axillary node-negative breast cancer</rdf:li>
            </rdf:Alt>
         </dc:title>
         <dc:description>
            <rdf:Alt>
               <rdf:li xml:lang="x-default">??? 2015, :. doi:10.1186/s12885-015-1468-6</rdf:li>
            </rdf:Alt>
         </dc:description>
         <dc:publisher>
            <rdf:Bag>
               <rdf:li>???</rdf:li>
            </rdf:Bag>
         </dc:publisher>
         <dc:rights>
            <rdf:Alt>
               <rdf:li xml:lang="x-default">© 2015 Forse et al.; licensee BioMed Central.</rdf:li>
            </rdf:Alt>
         </dc:rights>
         <dc:subject>
            <rdf:Bag>
               <rdf:li>Mena</rdf:li>
               <rdf:li>Metastasis</rdf:li>
               <rdf:li>Breast cancer</rdf:li>
               <rdf:li>Axillary node negative</rdf:li>
               <rdf:li>Prognostic marker</rdf:li>
            </rdf:Bag>
         </dc:subject>
      </rdf:Description>
      <rdf:Description xmlns:xmpRights="http://ns.adobe.com/xap/1.0/rights/" rdf:about="">
         <xmpRights:Marked>True</xmpRights:Marked>
      </rdf:Description>
      <rdf:Description xmlns:prism="http://prismstandard.org/namespaces/basic/2.0/" rdf:about="">
         <prism:url>???</prism:url>
         <prism:doi>10.1186/s12885-015-1468-6</prism:doi>
         <prism:pageRange>1-10</prism:pageRange>
         <prism:startingPage>1</prism:startingPage>
         <prism:endingPage>10</prism:endingPage>
         <prism:copyright>© 2015 Forse et al.; licensee BioMed Central.</prism:copyright>
         <prism:publicationName>???</prism:publicationName>
         <prism:aggregationType>journal</prism:aggregationType>
         <prism:volume/>
         <prism:rightsAgent>reprints@biomedcentral.com</prism:rightsAgent>
         <prism:number/>
         <prism:issueidentifier/>
         <prism:issn>???</prism:issn>
      </rdf:Description>
   </rdf:RDF>
</x:xmpmeta>
<?xpacket end="w"?>
